# Supplementary material for: Association between autonomic dysfunction and arterial stiffness in hypertensive patients: a cross‑sectional analysis
Source: Research Square preprint supplement (doi:10.21203/rs.3.rs-6771570/v1), 2025-06-29
Supplement: Supplementary file 1 [file e6efcc4e67bd6a90c49c5810.docx]

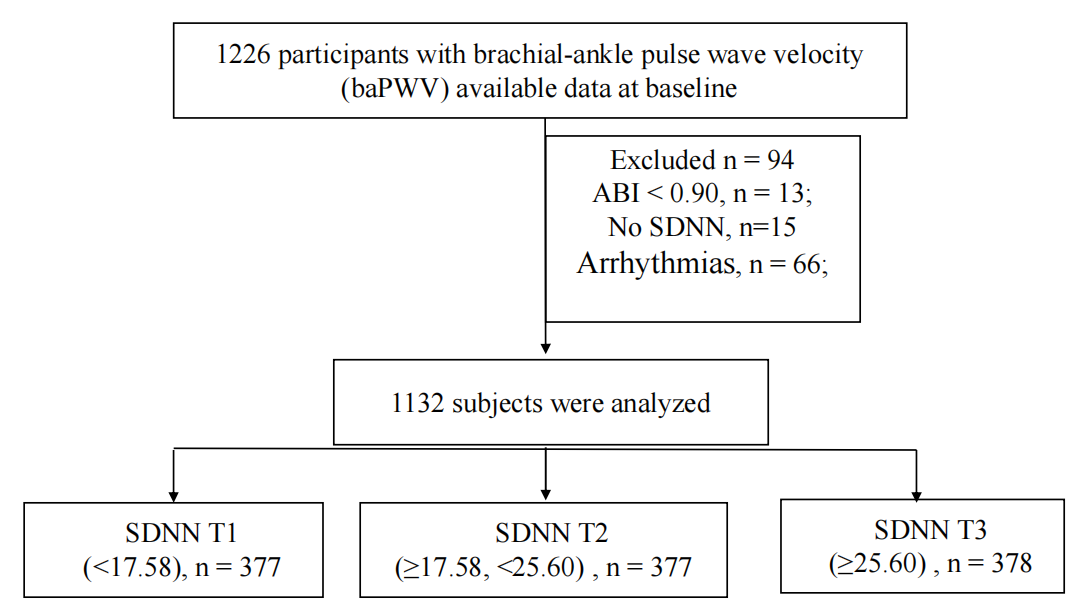


**Figure S1** Flow chart of the study participants

**baPWV* brachial to ankle pulse wave velocity, *ABI* ankle-brachial index, *SDNN* Standard Deviation of Normal-to-Normal Intervals,

| **Variable** | **β (95%CI)** | **P value** |
| --- | --- | --- |
| gender | -13.51 (-46.23,19.21) | 0.418 |
| age | 11.09 (10.27,11.92) | < 0.001 |
| BMI | -8.17 (-12.49,-3.84) | < 0.001 |
| SBP | -0.39 (-1.27,0.48) | 0.376 |
| DBP | -0.34 (-1.62,0.93) | 0.596 |
| Current smoking | -52.36 (-87.06,-17.67) | 0.003 |
| Current drinking | -13.26 (-47.13,20.61) | 0.443 |
| Antihypertensive drugs | 7.55 (-28.49,43.59) | 0.681 |
| Self-reported diabetes | 62.84 (-2.52,128.2) | 0.059 |
| Antidiabetes drugs | 55.49 (-10.85,121.83) | 0.101 |
| Total cholesterol | -12.17 (-27.28,2.95) | 0.115 |
| Triglyceride | -2.9 (-14.09,8.29) | 0.611 |
| HDL-C | -3.81 (-61.54,53.92) | 0.897 |
| LDL-C | -21.65 (-41.86,-1.44) | 0.036 |
| FPG | 39.34 (29.77,48.91) | < 0.001 |
| HbA1c | 79.25 (64.26,94.23) | < 0.001 |
| SDNN | -5.61 (-7.01,-4.21) | < 0.001 |
| rHR | 0.09 (-1.18,1.35) | 0.891 |
| cSDNN | -369.39 (-500.89,-237.88) | < 0.001 |
| pNN50 | -41.6 (-52.55,-30.64) | < 0.001 |

**Table S1.** Univariate linear regression analysis between baPWV and baseline characteristics.

** BMI* body mass index, *SBP* systolic blood pressure, *DBP* diastolic blood pressure, *HDL-C* high-density lipoprotein cholesterol, *LDL-C* low-density lipoprotein cholesterol, *FPG F*asting plasma glucose, *HbA1c* hemoglobin A1c, *SDNN* Standard Deviation of Normal-to-Normal Intervals, *rHR* resting heart rate, *bpm* beats per minute, *cSDNN* corrected SDNN, *PNN50* the percentage of normal-to-normal intervals that differ by more than 50 ms.


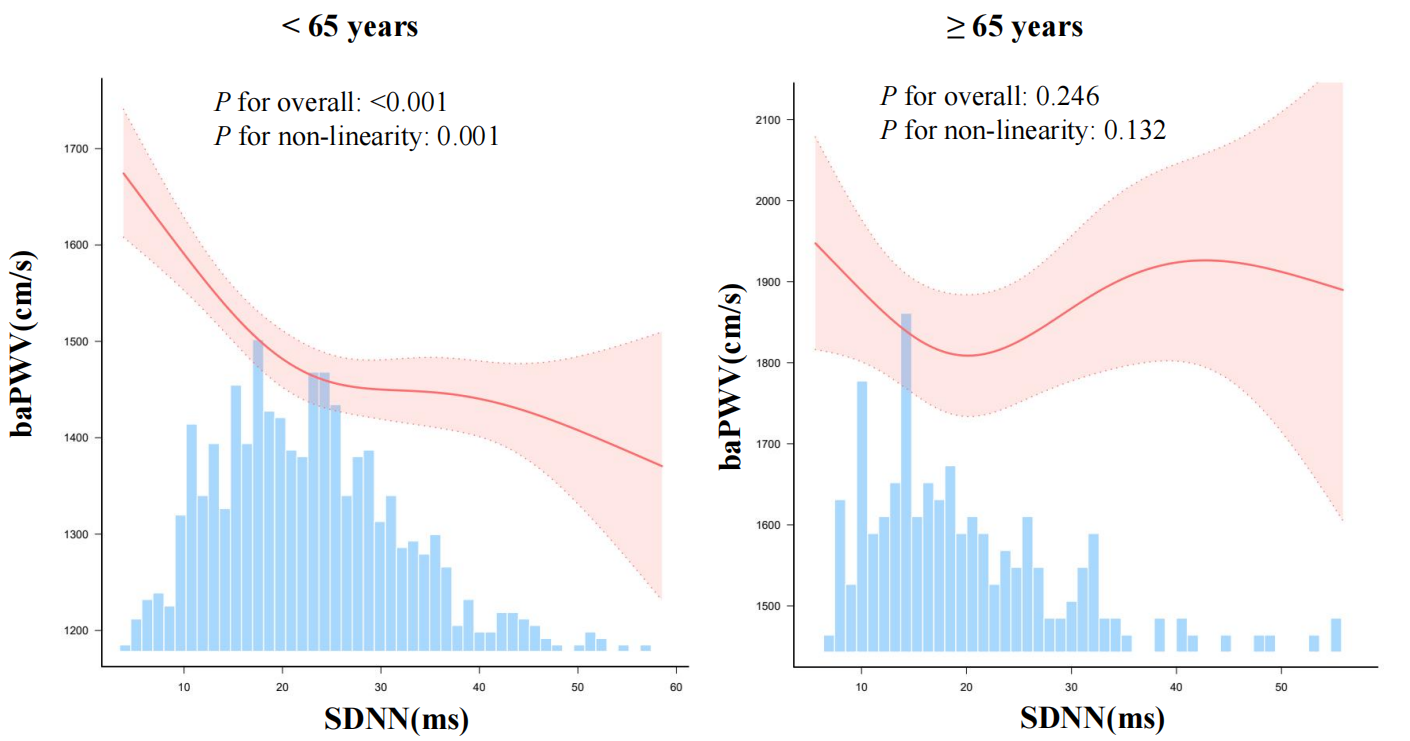


**Figure S2** the relationship between SDNN and baPWV in different age

*Adjusted for age，gender，BMI, current smoking，current drinking，SBP, DBP，Total cholesterol,，Triglyceride，HDL-C, LDL-C, FPG，HbA1c，self-reported diabetes，antihypertension drugs，antidiabetes drugs SDNN Standard Deviation of Normal-to-Normal Intervals, baPWV brachial to ankle pulse wave velocity, Only 99% of the data is displayed.

| **Variables** | **Total (n = 1132)** | **<65 years (n = 907)** | **≥65 years (n = 225)** | **p** |
| --- | --- | --- | --- | --- |
| gender, n (%) |  |  |  | < 0.001 |
| female | 369 (32.6) | 265 (29.2) | 104 (46.2) |  |
| male | 763 (67.4) | 642 (70.8) | 121 (53.8) |  |
| Age, (years) | 51.4 ± 14.6 | 46.1 ± 10.9 | 72.6 ± 6.0 | < 0.001 |
| BMI, (kg/m2) | 26.2 ± 3.5 | 26.5 ± 3.6 | 24.9 ± 3.0 | < 0.001 |
| SBP, (mmHg) | 147.1 ± 17.6 | 147.5 ± 17.9 | 145.5 ± 16.4 | 0.127 |
| DBP, (mmHg) | 91.9 ± 12.0 | 92.0 ± 11.9 | 91.4 ± 12.5 | 0.509 |
| Current smoking, n (%) |  |  |  | < 0.001 |
| no | 834 (73.7) | 647 (71.3) | 187 (83.1) |  |
| yes | 298 (26.3) | 260 (28.7) | 38 (16.9) |  |
| Current drinking, n (%) |  |  |  | 0.264 |
| no | 806 (71.2) | 639 (70.5) | 167 (74.2) |  |
| yes | 326 (28.8) | 268 (29.5) | 58 (25.8) |  |
| Antihypertensive drugs, n (%) |  |  |  | 0.339 |
| no | 269 (23.8) | 221 (24.4) | 48 (21.3) |  |
| yes | 863 (76.2) | 686 (75.6) | 177 (78.7) |  |
| Self-reported diabetes, n (%) |  |  |  | 0.012 |
| no | 1066 (94.2) | 862 (95) | 204 (90.7) |  |
| yes | 66 ( 5.8) | 45 (5) | 21 (9.3) |  |
| Antidiabetes drugs, n (%) |  |  |  | 0.019 |
| no | 1068 (94.3) | 863 (95.1) | 205 (91.1) |  |
| yes | 64 ( 5.7) | 44 (4.9) | 20 (8.9) |  |
| Total cholesterol, (mmol/L) | 4.7 ± 1.0 | 4.8 ± 1.0 | 4.3 ± 1.0 | < 0.001 |
| Triglyceride, (mmol/L) | 1.6 (1.2, 2.3) | 1.7 (1.2, 2.4) | 1.4 (1.0, 1.9) | < 0.001 |
| HDL-C, (mmol/L) | 1.1 ± 0.3 | 1.1 ± 0.3 | 1.1 ± 0.2 | 0.845 |
| LDL-C, (mmol/L) | 2.6 ± 0.8 | 2.7 ± 0.7 | 2.3 ± 0.8 | < 0.001 |
| FPG, (mmol/L) | 5.6 ± 1.6 | 5.6 ± 1.4 | 6.0 ± 2.0 | < 0.001 |
| HbA1c, (%) | 5.8 ± 1.0 | 5.7 ± 0.9 | 6.2 ± 1.2 | < 0.001 |
| SDNN, (ms) | 23.0 ± 10.7 | 23.6 ± 10.5 | 20.8 ± 11.2 | < 0.001 |
| rHR, (bpm) | 73.2 ± 12.1 | 74.6 ± 12.0 | 67.5 ± 10.8 | < 0.001 |
| pNN50, (%) | 0.1 (0.0, 0.2) | 0.1 (0.0, 0.2) | 0.0 (0.0, 0.1) | < 0.001 |
| cSDNN, (%) | 2.8 ± 1.4 | 2.9 ± 1.3 | 2.4 ± 1.5 | < 0.001 |
| ABI | 1.1 ± 0.1 | 1.1 ± 0.1 | 1.1 ± 0.1 | 0.024 |
| baPWV, (cm/s) | 1533.1 ± 262.9 | 1466.5 ± 220.7 | 1801.8 ± 248.1 | < 0.001 |

**Table S2** Baseline characteristics of total and groups by different age.

** BMI* body mass index, *SBP* systolic blood pressure, *DBP* diastolic blood pressure, *HDL-C* high-density lipoprotein cholesterol, *LDL-C* low-density lipoprotein cholesterol, *FPG F*asting plasma glucose, *HbA1c* hemoglobin A1c, *SDNN* Standard Deviation of Normal-to-Normal Intervals, *rHR* resting heart rate, *bpm* beats per minute, *cSDNN* corrected SDNN, *PNN50* the percentage of normal-to-normal intervals that differ by more than 50 ms.

| **cSDNN** | **BaPWV, cm/s，β (95%CI)** | **Elevated baPWV，OR (95%CI)** |
| --- | --- | --- |
| Per 1 unit increase | -2.48 (-3.18~-1.79) | 0.98 (0.97~0.99) |
| Tertiles |
| T1 (<23.39) | 0.00 | 1.00 |
| T2 (23.39~37.41) | -88.36 (-118.84~-57.88) | 0.42 (0.27~0.66) |
| T3 (≥37.41) | -104.81 (-135.39~-74.24) | 0.42 (0.27~0.65) |
| *P* for trend | <0.001 | <0.001 |

**Table S3** The relationships between cSDNN and baPWV, elevated baPWV.

*adjusted for age，gender，BMI, current smoking，current drinking，SBP, DBP，Total cholesterol,，Triglyceride，HDL-C, LDL-C, FPG，HbA1c，self-reported diabetes，antihypertension drugs，antidiabetes drugs

SDNN Standard Deviation of Normal-to-Normal Intervals, baPWV brachial to ankle pulse wave velocity, CI confidence interval.
